# Supplementary material for: Evaluation on Structural Properties and Performances of Graphene Oxide Incorporated into Chitosan/Poly-Lactic Acid Composites: CS/PLA versus CS/PLA-GO
Source: MDPI journal article supplement (doi:10.3390/polym13111839), 2021-06-02
Supplement: s1 [file s1]

### Supplementary data

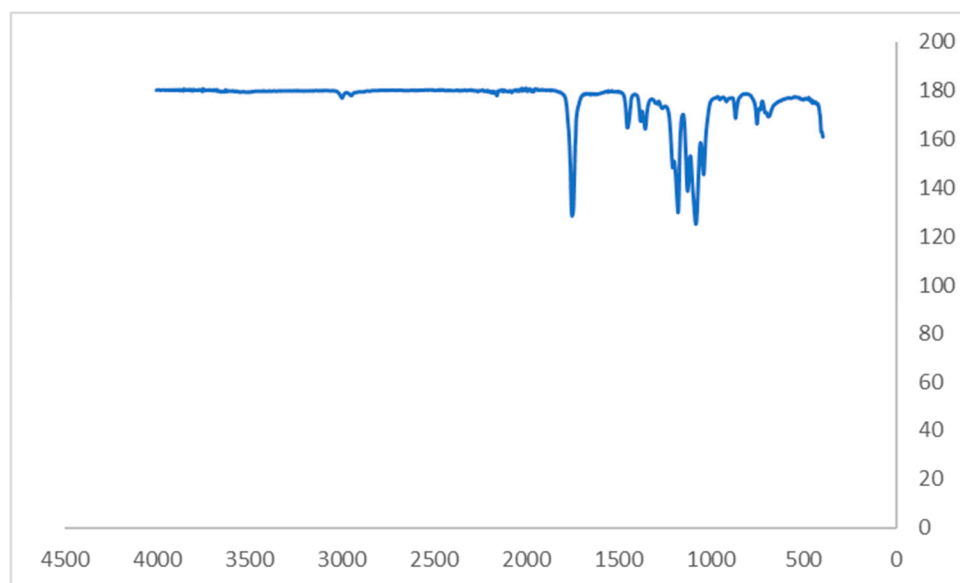

**Figure S1.** FTIR of PLA sample.

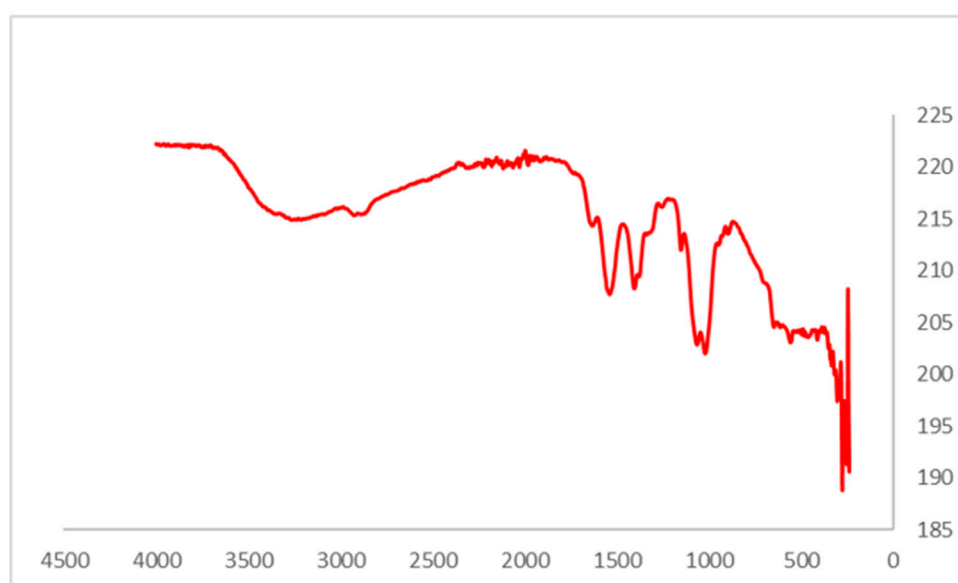

**Figure S2.** FTIR of DSC sample.

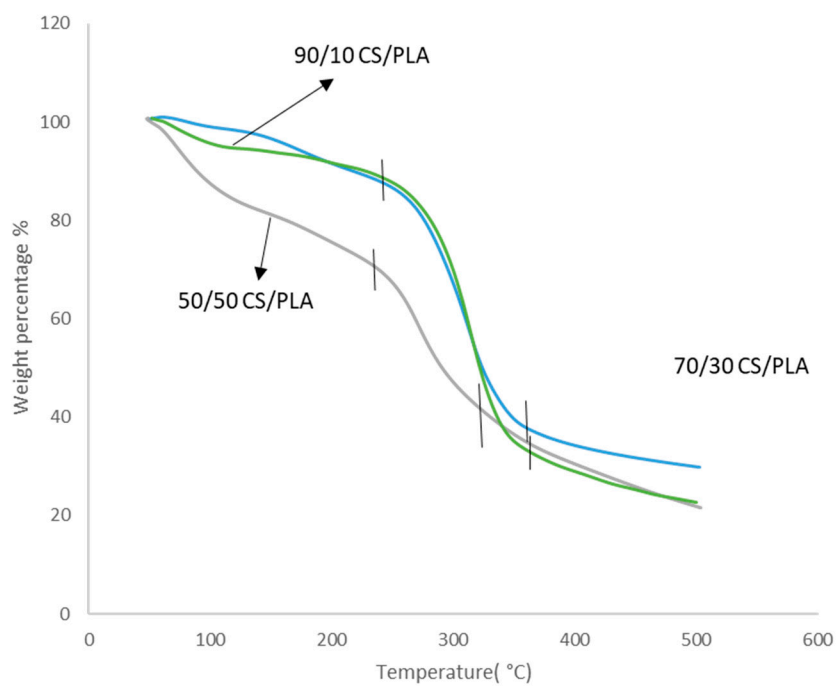

**Figure S3.** FTIR of CS/PLA without GO samples at different concentration.

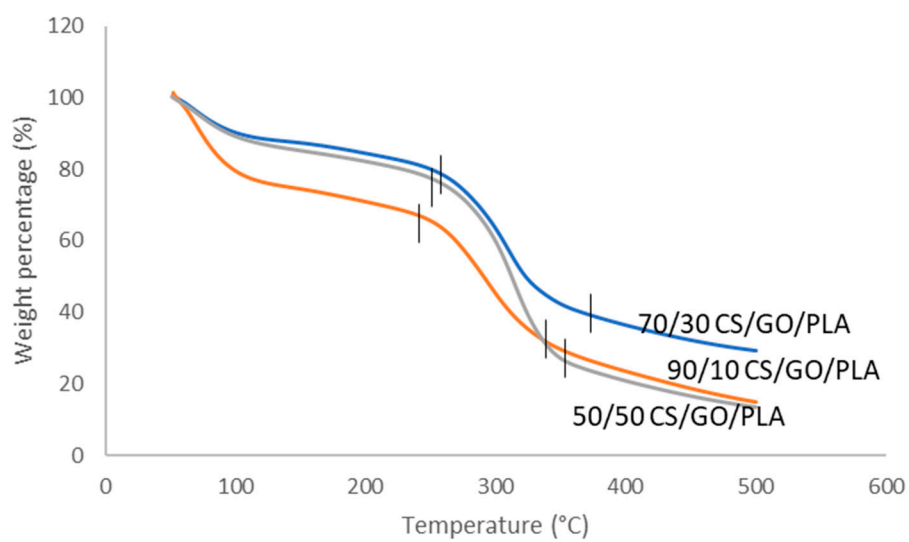

**Figure S4.** FTIR of CS/PLA with GO samples at different concentration.
